# Supplementary material for: Heterogeneous formation and light absorption of secondary organic aerosols from acetone photochemical reactions: remarkably enhancing effects of seeds and ammonia
Source: Copernicus journal article supplement (doi:10.5194/acp-24-14177-2024), 2024-12-19
Supplement: Supplementary file 1 [file acp-24-14177-2024-supplement.pdf]

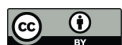

*Supplement of*

**Heterogeneous formation and light absorption of secondary organic aerosols from acetone photochemical reactions: remarkably enhancing effects of seeds and ammonia**

Si Zhang et al.

*Correspondence to:* Gehui Wang (ghwang@geo.ecnu.edu.cn)

The copyright of individual parts of the supplement might differ from the article licence.

1 *Supporting Information*

2

3

4

5 This PDF file includes:

6 1. Supplementary Text S1-S5

7 2. Ten figures, Figure S1-S12

8 3. Three tables, Table S1-S3

9 4. References

10

11

12

### 13 **Text S1. Particle wall loss correction**

14 The particle wall loss was corrected by using a total-mass-concentration-based method  
15 (Liu and Abbatt, 2021). The wall-loss-corrected sulfate concentration at time  $t$   $wC_{\text{so}_4^{2-}}(t)$   
16 can be calculated using the Eq.(1).

$$17 \quad wC_{\text{so}_4^{2-}}(t) = C_{\text{so}_4^{2-}}^{\text{SUS}}(t) + k \int_0^t C_{\text{so}_4^{2-}}^{\text{SUS}}(t) dt \quad (1)$$

18 where  $C_{\text{so}_4^{2-}}^{\text{SUS}}(t)$  is the measured sulfate concentration at time  $t$ , and  $k$  is the first order  
19 particles wall loss rate constant,  $1 \times 10^{-4} \text{ s}^{-1}$  in this study. The wall loss rate constants of pure  
20  $(\text{NH}_4)_2\text{SO}_4$  seed and  $\text{NH}_4\text{NO}_3$  seed were similar under the experimental conditions in this  
21 work.

### 22 **Text S2. $\text{NH}_3$ concentration wall loss correction**

23 According to the reports of Huang et al. (2018) and Zhang et al. (2014), the vapor wall  
24 loss of gas compounds in Teflon-walled chambers can be estimated by a two-layer model, and  
25 the overall mass transport coefficient across the gas-phase boundary layer and the air-Teflon  
26 interface can be calculated by Eq.2-4. Then the first-order wall loss coefficient ( $k_w$ ) can be  
27 calculated by Eq.5. Therefore, the loss of  $\text{NH}_3$  to the chamber wall is estimated by the  $k_w$  by  
28 considering the gas-phase transport within the chamber, as reported by Zhang et al. (2014)

$$v_1 = \left( \frac{1}{v_e} + \frac{1}{v_c} \right)^{-1} \quad (2)$$

$$v_e = \frac{2}{\pi} \sqrt{k_e D_g} \quad (3)$$

$$v_c = \frac{\alpha_w \omega}{4} \quad (4)$$

$$k_w = \left( \frac{A}{V} \right) v_1 = \left( \frac{A}{V} \right) \frac{\alpha_w \omega}{4 + \frac{\pi}{2} \left( \frac{\alpha_w \omega}{\sqrt{k_e D_g}} \right)} \quad (5)$$

29 where  $A/V$  is the surface-to-volume ratio of the chamber;  $\alpha_w$  is the mass accommodation  
30 coefficient of  $\text{NH}_3$  onto the Teflon chamber walls at  $\text{RH} = 90\%$  (0.01) (Bongartz et al., 1995);  
31  $\omega$  is the mean molecular speed of  $\text{NH}_3$  ( $603 \text{ m s}^{-1}$ ) (Seinfeld and Pandis, 2006);  $k_e$  is the

32 coefficient of eddy diffusion and is estimated to be 0.31 for the chamber used in this work;  $D_g$   
 33 is the gas-phase diffusion coefficient ( $1.98 \times 10^{-5}$ ) (Tang et al., 2014).

34 Therefore, the loss of  $NH_3$  to the chamber wall is estimated by the  $k_w$  by considering the  
 35 gas-phase transport within the chamber (Zhang et al., 2014). The average concentration of  
 36  $NH_3$  is estimated by eq. 6,

$$[\overline{NH_3}] = \frac{1 - e^{-k_w \Delta t}}{k_w \Delta t} [NH_3]_0 \quad (6) \quad 37$$

38 where the first-order wall-loss coefficient ( $k_w$ ) of  $NH_3$  in this study is  $9.5 \times 10^{-3} s^{-1}$  and  $\Delta t$  is  
 39 the reaction time. For an initial injection concentration of 1250 ppbv  $NH_3$ , the average  
 40 concentration of  $NH_3$  in the chamber was corrected to be 73 ppbv.

#### 41 **Text S3. VOCs concentration wall loss correction and estimation of MGly concentration**

42 The vapor wall loss coefficients of VOCs in chamber were also calculated by Eq.2. The  
 43 values of  $\alpha_w$ ,  $k_e$ ,  $\omega$  and  $D_g$  of VOCs were calculated by eq.7-10, respectively (Huang et al.,  
 44 2018).

$$\alpha_w = 10^{-2.744} (c^*)^{-0.6566} \quad (7)$$

$$\log_{10} c^* = (n_C^0 - n_C) b_C - n_O b_O - 2 \frac{n_C n_O}{n_C + n_O} b_{CO} - n_N b_N - n_S b_S, \quad (8)$$

$$k_e = 0.004 + 10^{-2.25} (V)^{0.74} \quad (9)$$

$$\omega = \sqrt{\frac{8RT}{\pi MW_{voc}}} \quad (10)$$

45 where  $c^*$  is the vapor saturation concentration of VOCs, and the calculation method and all  
 46 parameters were explained in detail by Li et al. (2016);  $R$  is the gas constant,  $8.314 (kg m^2 s^{-2}$   
 47  $K^{-1} mol^{-1})$ ;  $T$  is the temperature;  $MW_{voc}$  is the vapor molecular weight of VOCs;  $D_g$  of VOCs  
 48 were referred to the results of Tang et al. (2015).

49 In this study, the concentrations of MGly measured by PTR-MS were the equilibrium  
 50 concentrations after gas-particle partitioning and multiphase reactions, which would  
 51 underestimate the contribution of MGLY in the SOA formation. Hence, the total

52 concentrations of MGly in gas phase were estimated through the molar yield (14%) of MGLY  
 53 in acetone-OH oxidation reported by Fu et al. (2008). Then the total concentrations of MGly  
 54 were vapor wall loss corrected by  $k_w$ .

55 **Text S4. The calculation of the MAC of SOA**

56 In this study, the light absorption coefficient ( $Abs_\lambda$ ,  $M\ m^{-1}$ ) and the mass absorption  
 57 coefficient ( $MAC_\lambda$ ,  $m^2\ g^{-1}$ ) at the wavelength of  $\lambda$  of SOA were calculated using eq.13 and 14,  
 58 respectively (Liu et al., 2023).

$$Abs_\lambda = (A_\lambda - A_{700}) \frac{V_w}{V_a \times l} \times \ln (10) \quad (13)$$

$$MAC_\lambda = \frac{Abs_\lambda}{M} \quad (14)$$

59 where  $A_\lambda$  and  $A_{700}$  represent the light absorption at the wavelengths of  $\lambda$  and 700 nm measured  
 60 by LWCC, respectively;  $V_w$  and  $V_a$  represent the volume of solvent and the volume of air  
 61 corresponding to the filter punch, respectively; and  $l$  is the absorbing path length (1 m);  $M$  is  
 62 the concentration of water-soluble organic carbon (WSOC,  $\mu gC\ m^{-3}$ ).

63 **Text S5. The calculation of the partition coefficients of  $NH_3$  ( $\epsilon(NH_4^+)$ )**

64 The partition coefficients of  $NH_3$  ( $\epsilon(NH_4^+)$ ) on different seeds were calculated by eq.15  
 65 and 16 (Guo et al., 2017; Nah et al., 2018).

$$\epsilon(NH_4^+) \cong \frac{\frac{\gamma_{H^+} 10^{-pH}}{\gamma_{NH_4^+}} H_{NH_3}^* W_i RT \times 0.987 \times 10^{-14}}{1 + \frac{\gamma_{H^+} 10^{-pH}}{\gamma_{NH_4^+}} H_{NH_3}^* W_i RT \times 0.987 \times 10^{-14}} \quad (15)$$

$$\ln (H_{NH_3}^*) = 25.393 - 10373.6(1/T_r - 1/T) + 4.131(T_r/T - (1 + \ln (T_r/T))) \quad (16)$$

66 where  $\gamma_{H^+}$  and  $\gamma_{NH_4^+}$  are activity coefficients of  $H^+$  and  $NH_4^+$ , respectively, calculated from  
 67 E-AIM model;  $H_{NH_3}^*$  is equilibrium constants calculated by eq.16;  $R$  is the gas constant;  $T$  is  
 68 temperature;  $W_i$  is particle liquid water content associated with inorganic species.  
 69

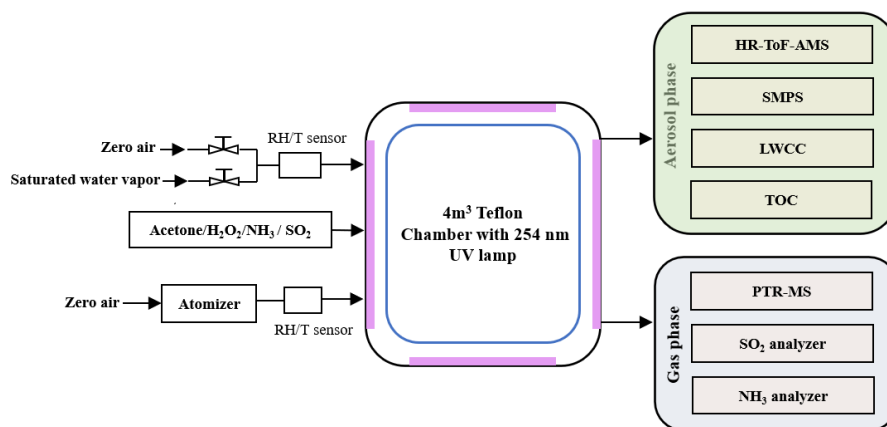

70

**Figure S1.** A schematic diagram of experimental setup in this work

71

72

73

74

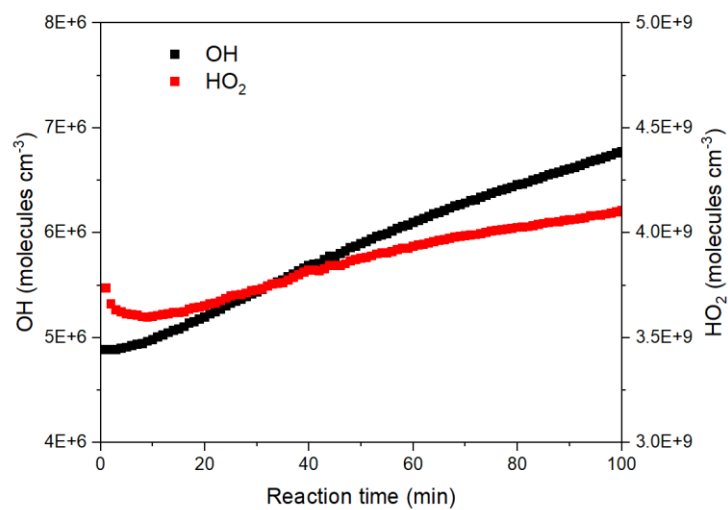

75

**Figure S2.** The times series of OH and HO<sub>2</sub> radical concentrations during Phase I.

76

77

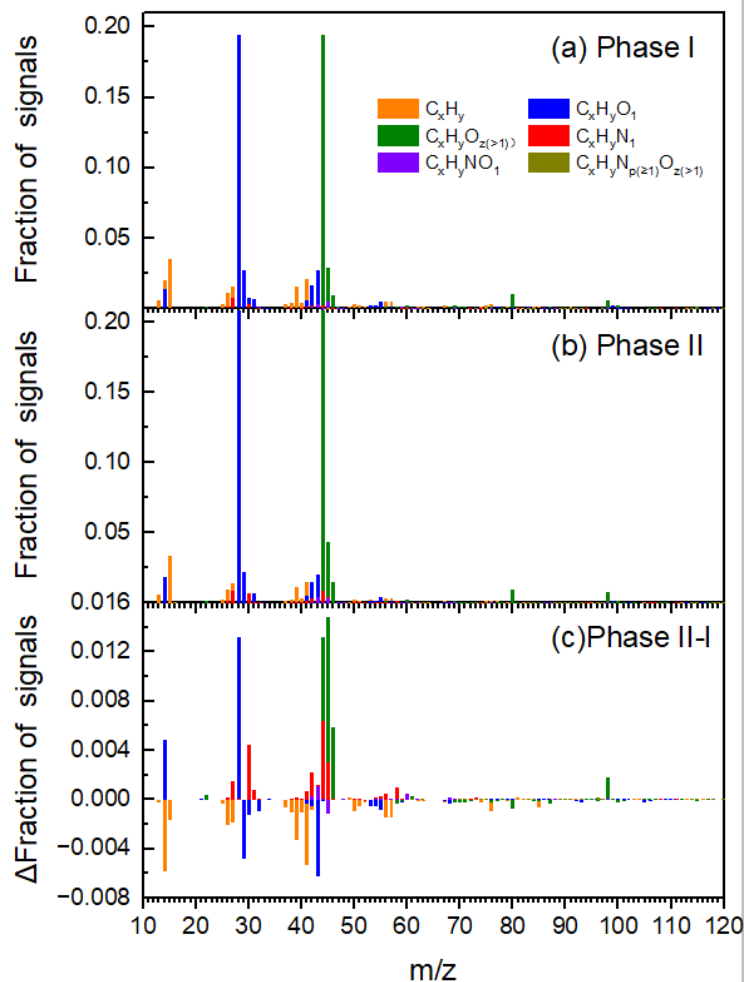

78

79 **Figure S3.** The mass spectra of acetone-derived SOA measured by HR-AMS during  
 80 the Phase I and Phase II (a and b) and their difference between the two phases (c). Data  
 81 were taken and analyzed at a high resolution but were summarized to a unit mass  
 82 resolution for display.

83

84

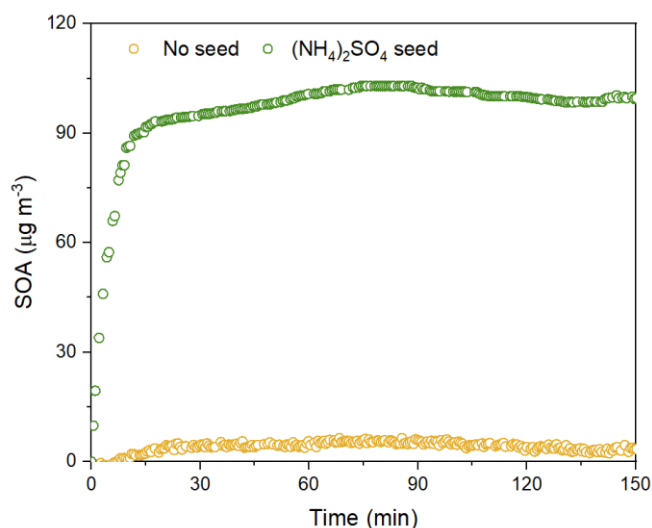

85

86 **Figure S4.** Concentrations of acetone-derived SOA in the chamber during the Phase I  
 87 as a function of reaction time in the absence and presence of  $(\text{NH}_4)_2\text{SO}_4$  seeds,  
 88 respectively.

89

90

91

92

93

94

95

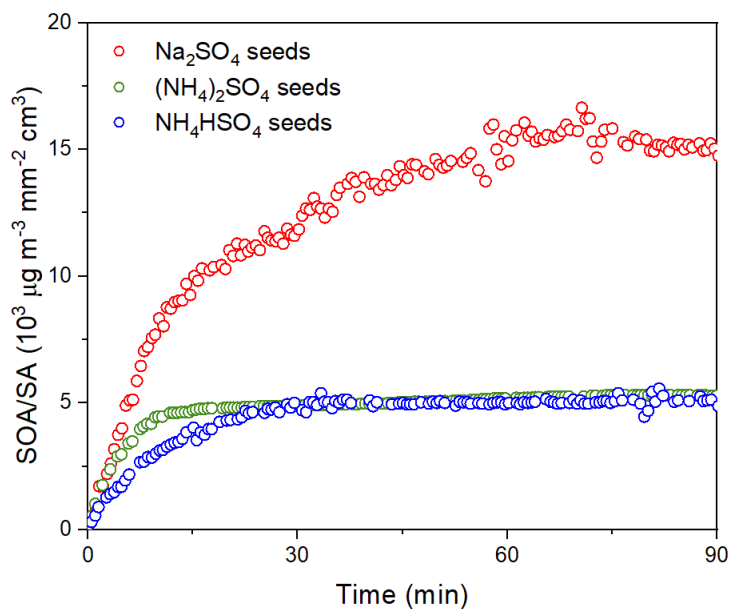

96

97 **Figure S5.** Normalized concentrations of SOA to the surface area (SA) of different  
 98 seeds at Phase I as a function of reaction time during the exposure of various seeds to  
 99 750 ppb acetone and  $5.3 \times 10^8$  molecules  $\text{cm}^{-3}$  OH radicals under 85% RH.

100



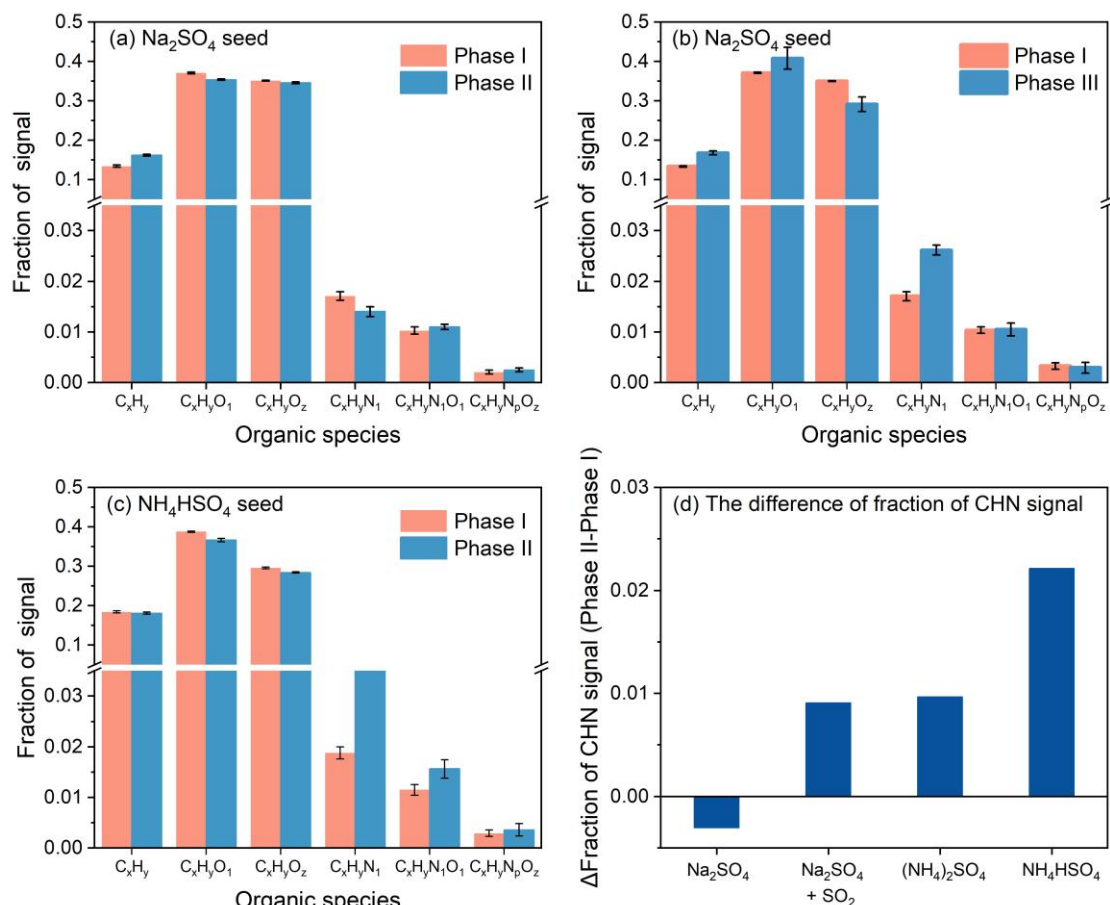

101

102 **Figure S6.** (a-c) The fraction of various organic species family signal of acetone-  
 103 derived SOA at different reaction phases. (Phase I: Photoreaction of acetone by OH  
 104 radicals without NH<sub>3</sub>; Phase II: Reaction of acetone oxidation products with NH<sub>3</sub>  
 105 under dark conditions; Phase III: Addition of 500 ppb SO<sub>2</sub> into the chamber after  
 106 Phase II in the presence of Na<sub>2</sub>SO<sub>4</sub> seeds); (d) The enhancement of the fraction of  
 107 CHN ions family of Phase II over Phase I on different seeds (the value on Na<sub>2</sub>SO<sub>4</sub>  
 108 seed with SO<sub>2</sub> is the enhancement of Phase III over Phase I).

109

110

111

112

113

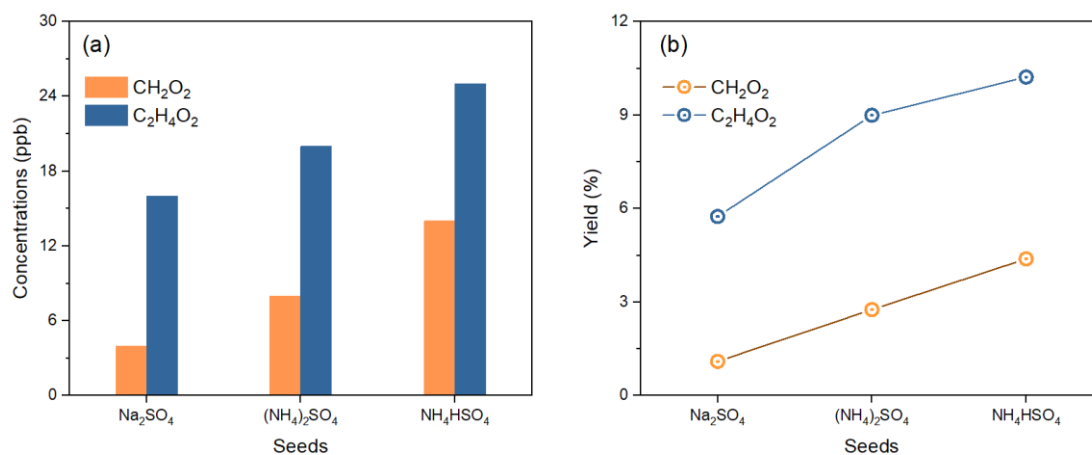

114  
115  
116  
117  
118

**Figure S7.** The concentrations (a) and yield (b) of formic and acetic acids in gas phase during steady state of reaction on various seeds.

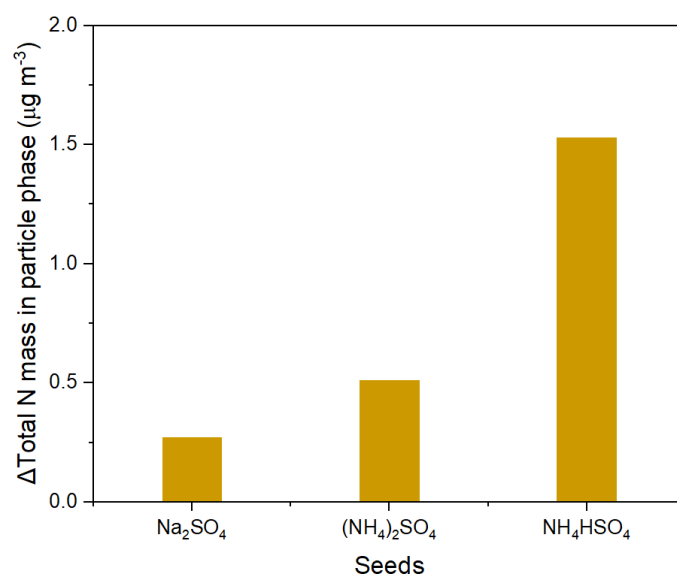

119  
120

**Figure S8.** The enhancement of the total N mass in particle phase at Phase II.

121

122

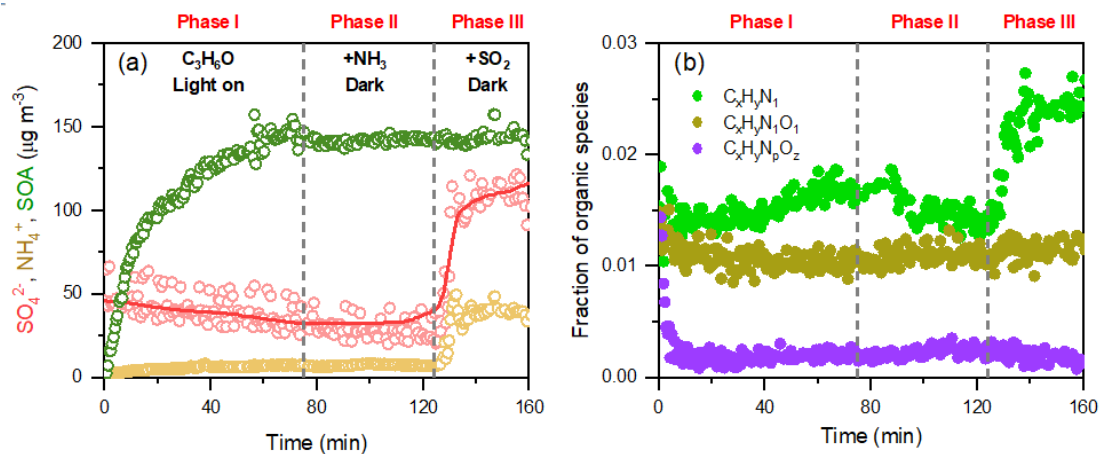

123

124

125

126

127

128

129

130

131

132

133

134

135

136

137

138

139

140

141

142

143

144

145

146

147

148

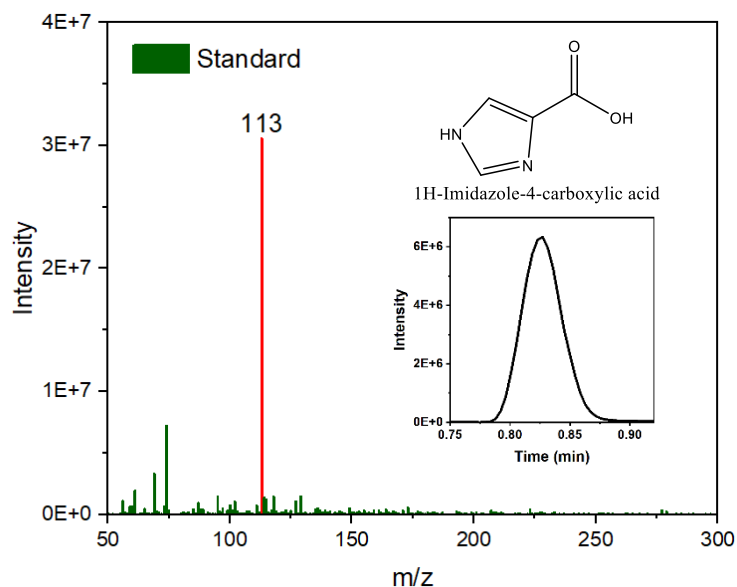

146

147

148

**Figure S10.** The ESI-Orbitrap MS spectra of the 1H-Imidazole-4-carboxylic acid standard.

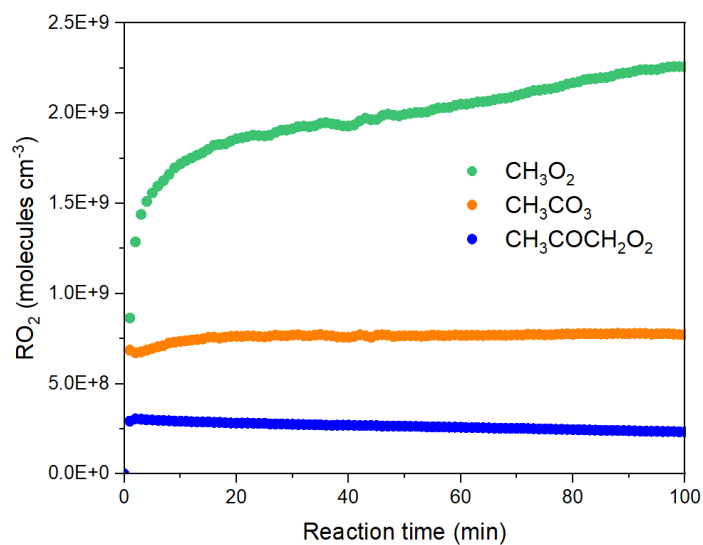

149

150 **Figure S11.** The times series of three main RO<sub>2</sub> concentrations during Phase I.

151

152

153

154

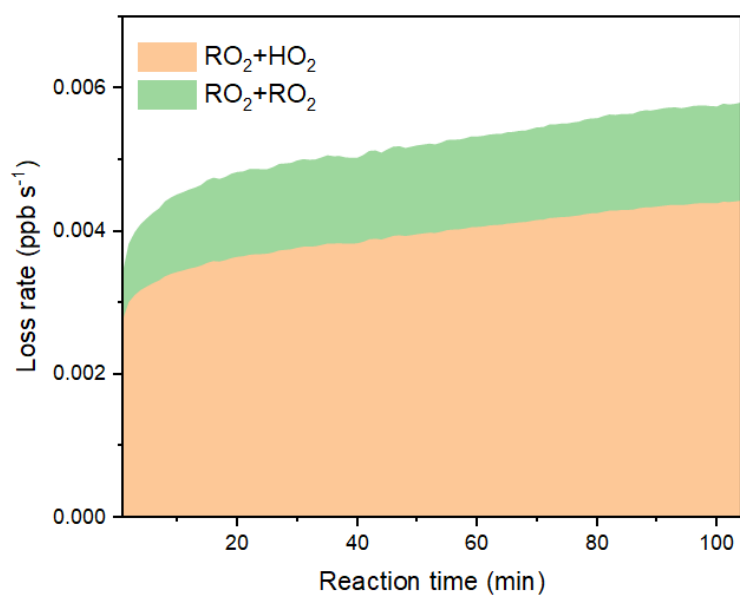

155

156 **Figure S12.** Loss rates of RO<sub>2</sub>+HO<sub>2</sub> and RO<sub>2</sub>+RO<sub>2</sub> pathways in acetone photoreaction  
157 during the experiment

**Table S1.** The reaction conditions of the experiments

| Exp. No. | Acetone<br>(ppb) | OH <sup>a</sup><br>(molecules cm <sup>-3</sup> ) | NH <sub>3</sub> <sup>b</sup><br>(ppb) | SO <sub>2</sub><br>(ppb) | Seeds                                           | RH<br>(%) |
|----------|------------------|--------------------------------------------------|---------------------------------------|--------------------------|-------------------------------------------------|-----------|
| 1        | 750              | 5.89 × 10 <sup>6</sup>                           | 73                                    | /                        | (NH <sub>4</sub> ) <sub>2</sub> SO <sub>4</sub> | 85±1      |
| 2        | 750              | 5.89 × 10 <sup>6</sup>                           | 73                                    | /                        | (NH <sub>4</sub> )HSO <sub>4</sub>              | 85±1      |
| 3        | 750              | 5.89 × 10 <sup>6</sup>                           | 73                                    | /                        | Na <sub>2</sub> SO <sub>4</sub>                 | 85±1      |
| 4        | 750              | 5.89 × 10 <sup>6</sup>                           | 73                                    | 500                      | Na <sub>2</sub> SO <sub>4</sub>                 | 85±1      |
| 5        | 750              | 5.89 × 10 <sup>6</sup>                           | 73                                    | /                        | /                                               | 85±1      |

<sup>a</sup> The concentrations of OH radicals in all experiments are average concentrations during Phase I. These concentrations are determined using an OBM-MCM.

<sup>b</sup> The concentrations of NH<sub>3</sub> are wall-loss corrected average concentrations during Phase II, without considering the reaction process.

161

162

**Table S2.** ESI-Orbitrap MS measured products in acetone SOA

| Measured Mass<br>[M+H] <sup>+</sup> | Theory Mass | Suggested Formula                                             | Molecular Structure | Seeds                                           | Ref.                  |
|-------------------------------------|-------------|---------------------------------------------------------------|---------------------|-------------------------------------------------|-----------------------|
| 72                                  | 71          | C <sub>3</sub> H <sub>5</sub> NO                              |                     |                                                 | De Haan et al. (2019) |
| 117                                 | 116         | C <sub>5</sub> H <sub>8</sub> O <sub>3</sub>                  |                     |                                                 |                       |
| 133                                 | 132         | C <sub>5</sub> H <sub>8</sub> O <sub>4</sub>                  |                     |                                                 |                       |
| 163                                 | 162         | C <sub>6</sub> H <sub>10</sub> O <sub>5</sub>                 |                     | (NH <sub>4</sub> ) <sub>2</sub> SO <sub>4</sub> | Li et al. (2021b)     |
| 195                                 | 194         | C <sub>9</sub> H <sub>10</sub> N <sub>2</sub> O <sub>3</sub>  |                     |                                                 | Aiona et al. (2017)   |
| 235                                 | 234         | C <sub>9</sub> H <sub>14</sub> O <sub>7</sub>                 |                     |                                                 | Li et al. (2021b)     |
| 341                                 | 340         | C <sub>15</sub> H <sub>20</sub> O <sub>7</sub> N <sub>2</sub> |                     |                                                 | Aiona et al. (2017)   |
| 105                                 | 104         | C <sub>3</sub> H <sub>4</sub> O <sub>4</sub>                  |                     |                                                 | Altieri et al. (2008) |
| 119                                 | 118         | C <sub>4</sub> H <sub>6</sub> O <sub>4</sub>                  |                     |                                                 | Altieri et al. (2008) |
| 135                                 | 134         | C <sub>4</sub> H <sub>6</sub> O <sub>5</sub>                  |                     |                                                 | Altieri et al. (2008) |
| 161                                 | 160         | C <sub>6</sub> H <sub>8</sub> O <sub>5</sub>                  |                     | Na <sub>2</sub> SO <sub>4</sub>                 |                       |
| 179                                 | 178         | C <sub>6</sub> H <sub>10</sub> O <sub>6</sub>                 |                     |                                                 | Guzmán et al. (2006)  |
| 217                                 | 216         | C <sub>9</sub> H <sub>12</sub> O <sub>6</sub>                 |                     |                                                 | Zhao et al. (2006)    |

233 232 C<sub>9</sub>H<sub>12</sub>O<sub>7</sub>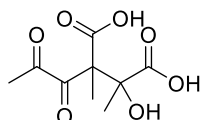

Tan et al. (2012)

163

164

165

166

167

**Table S3** The concentrations and saturation mass concentration of VOCs products formed from acetone photooxidation in gas phase

| Gaseous products                               | Molecular structure | Concentration (ppb) | C* (ug m <sup>-3</sup> )  | Volatility  | K <sub>H</sub> (M atm <sup>-1</sup> ) |
|------------------------------------------------|---------------------|---------------------|---------------------------|-------------|---------------------------------------|
| C <sub>3</sub> H <sub>4</sub> O <sub>2</sub>   |                     | 1.82                | 2.3×10 <sup>7</sup>       | VOC         | 3.7×10 <sup>3</sup>                   |
| C <sub>2</sub> H <sub>4</sub> O <sub>2</sub>   |                     | 22.95               | 3.2×10 <sup>7</sup>       | VOC         | 1.8×10 <sup>3</sup>                   |
| CH <sub>2</sub> O <sub>2</sub>                 |                     | 7.84                | 2.7×10 <sup>7</sup>       | VOC         | 1.3×10 <sup>3</sup>                   |
| <b>C<sub>2</sub>H<sub>4</sub>O<sub>3</sub></b> |                     | 4.16                | <b>1.4×10<sup>6</sup></b> | <b>IVOC</b> | 7.2×10 <sup>2</sup>                   |
| CH <sub>4</sub> O <sub>2</sub>                 |                     | 7.95                | 2.7×10 <sup>7</sup>       | VOC         | 1.5×10 <sup>2</sup>                   |
| CH <sub>4</sub> O                              |                     | 0.35                | 6.7×10 <sup>8</sup>       | VOC         | 2.3×10 <sup>2</sup>                   |
| <b>C<sub>3</sub>H<sub>6</sub>O<sub>3</sub></b> |                     | 1.65                | <b>1.5×10<sup>6</sup></b> | <b>IVOC</b> | 3.1×10 <sup>4</sup>                   |
| C <sub>3</sub> H <sub>6</sub> O <sub>2</sub>   |                     | 0.12                | 2.3×10 <sup>7</sup>       | VOC         | 1.3×10 <sup>2</sup>                   |

168

169

170

171

172

173

174

175

176

177

178

179 **Reference:**

- 180 Aiona, P. K., Lee, H. J., Leslie, R., Lin, P., Laskin, A., Laskin, J., and Nizkorodov, S. A.: Photochemistry  
181 of products of the aqueous reaction of methylglyoxal with ammonium sulfate, *ACS Earth Space*  
182 *Chem.*, 1, 522-532, 10.1021/acsearthspacechem.7b00075, 2017.
- 183 Altieri, K. E., Seitzinger, S. P., Carlton, A. G., Turpin, B. J., Klein, G. C., and Marshall, A. G.: Oligomers  
184 formed through in-cloud methylglyoxal reactions: Chemical composition, properties, and mechanisms  
185 investigated by ultra-high resolution FT-ICR mass spectrometry, *Atmospheric Environment*, 42, 1476-  
186 1490, 10.1016/j.atmosenv.2007.11.015, 2008.
- 187 Bongartz, A., Schweighoefer, S., Roose, C., and Schurath, U.: The mass accommodation coefficient of  
188 ammonia on water, *Journal of Atmospheric Chemistry*, 20, 35-58, 10.1007/bf01099917, 1995.
- 189 De Haan, D. O., Pajunoja, A., Hawkins, L. N., Welsh, H. G., Jimenez, N. G., De Loera, A., Zauscher, M.,  
190 Andretta, A. D., Joyce, B. W., De Haan, A. C., Riva, M., Cui, T. Q., Surratt, J. D., Cazaunau, M.,  
191 Formenti, P., Gratién, A., Pangui, E., and Doussin, J. F.: Methylamine's Effects on Methylglyoxal-  
192 Containing Aerosol: Chemical, Physical, and Optical Changes, *ACS Earth and Space Chemistry*, 3,  
193 1706-1716, 10.1021/acsearthspacechem.9b00103, 2019.
- 194 Fu, T. M., Jacob, D. J., Wittrock, F., Burrows, J. P., Vrekoussis, M., and Henze, D. K.: Global budgets of  
195 atmospheric glyoxal and methylglyoxal, and implications for formation of secondary organic aerosols,  
196 *J. Geophys. Res.: Atmos.*, 113, D15303, 10.1029/2007jd009505, 2008.
- 197 Guo, H., Liu, J., Froyd, K. D., Roberts, J. M., Veres, P. R., Hayes, P. L., Jimenez, J. L., Nenes, A., and  
198 Weber, R. J.: Fine particle pH and gas-particle phase partitioning of inorganic species in Pasadena,  
199 California, during the 2010 CalNex campaign, *Atmos. Chem. Phys.*, 17, 5703-5719, 10.5194/acp-17-  
200 5703-2017, 2017.
- 201 Guzmán, M. I., Colussi, A. J., and Hoffmann, M. R.: Photoinduced Oligomerization of Aqueous Pyruvic  
202 Acid, *The Journal of Physical Chemistry A*, 110, 3619-3626, 10.1021/jp056097z, 2006.
- 203 Huang, Y., Zhao, R., Charan, S. M., Kenseth, C. M., Zhang, X., and Seinfeld, J. H.: Unified theory of  
204 vapor-wall mass transport in Teflon-walled environmental chambers, *Environ. Sci. Technol.*, 52,  
205 2134-2142, 10.1021/acs.est.7b05575, 2018.
- 206 Li, Y., Pöschl, U., and Shiraiwa, M.: Molecular corridors and parameterizations of volatility in the  
207 chemical evolution of organic aerosols, *Atmospheric Chemistry and Physics*, 16, 3327-3344,  
208 10.5194/acp-16-3327-2016, 2016.
- 209 Li, Y. X., Zhao, J. Y., Wang, Y., Seinfeld, J. H., and Zhang, R. Y.: Multigeneration production of secondary  
210 organic aerosol from toluene photooxidation, *Environ. Sci. Technol.*, 55, 8592-8603,  
211 10.1021/acs.est.1c02026, 2021a.
- 212 Li, Y. X., Ji, Y. M., Zhao, J. Y., Wang, Y., Shi, Q. J., Peng, J. F., Wang, Y. Y., Wang, C. Y., Zhang, F.,  
213 Wang, Y. X., Seinfeld, J. H., and Zhang, R. Y.: Unexpected oligomerization of small alpha-dicarbonyls  
214 for secondary organic aerosol and brown carbon formation, *Environ. Sci. Technol.*, 55, 4430-4439,  
215 10.1021/acs.est.0c08066, 2021b.
- 216 Liu, T. and Abbatt, J. P. D.: Oxidation of sulfur dioxide by nitrogen dioxide accelerated at the interface  
217 of deliquesced aerosol particles, *Nat. Chem.*, 13, 1173-1177, 10.1038/s41557-021-00777-0, 2021.
- 218 Liu, X., Wang, H., Wang, F., Lv, S., Wu, C., Zhao, Y., Zhang, S., Liu, S., Xu, X., Lei, Y., and Wang, G.:  
219 Secondary formation of atmospheric brown carbon in China haze: Implication for an enhancing role  
220 of ammonia, *Environ. Sci. Technol.*, 57, 11163-11172, 10.1021/acs.est.3c03948, 2023.
- 221 Nah, T., Guo, H., Sullivan, A. P., Chen, Y., Tanner, D. J., Nenes, A., Russell, A., Ng, N. L., Huey, L. G.,  
222 and Weber, R. J.: Characterization of aerosol composition, aerosol acidity, and organic acid



223 partitioning at an agriculturally intensive rural southeastern US site, *Atmospheric Chemistry and*  
224 *Physics*, 18, 11471-11491, 10.5194/acp-18-11471-2018, 2018.

225 Seinfeld, J. H. and Pandis, S. N.: *ATMOSPHERIC CHEMISTRY AND PHYSICS: from air pollution to*  
226 *climate change*, John Wiley & Sons, 2<sup>nd</sup> ed., ISBN: 978-0-471-72018-8, 2006.

227 Tan, Y., Lim, Y. B., Altieri, K. E., Seitzinger, S. P., and Turpin, B. J.: Mechanisms leading to oligomers  
228 and SOA through aqueous photooxidation: insights from OH radical oxidation of acetic acid and  
229 methylglyoxal, *Atmospheric Chemistry and Physics*, 12, 801-813, 10.5194/acp-12-801-2012, 2012.

230 Tang, M. J., Cox, R. A., and Kalberer, M.: Compilation and evaluation of gas phase diffusion coefficients  
231 of reactive trace gases in the atmosphere: volume 1. Inorganic compounds, *Atmospheric Chemistry*  
232 *and Physics*, 14, 9233-9247, 10.5194/acp-14-9233-2014, 2014.

233 Tang, M. J., Shiraiwa, M., Pöschl, U., Cox, R. A., and Kalberer, M.: Compilation and evaluation of gas  
234 phase diffusion coefficients of reactive trace gases in the atmosphere: Volume 2. Diffusivities of  
235 organic compounds, pressure-normalised mean free paths, and average Knudsen numbers for gas  
236 uptake calculations, *Atmospheric Chemistry and Physics*, 15, 5585-5598, 10.5194/acp-15-5585-2015,  
237 2015.

238 Zhang, X., Cappa, C. D., Jathar, S. H., McVay, R. C., Ensberg, J. J., Kleeman, M. J., and Seinfeld, J. H.:  
239 Influence of vapor wall loss in laboratory chambers on yields of secondary organic aerosol, *Proc Natl*  
240 *Acad Sci U S A*, 111, 5802-5807, 10.1073/pnas.1404727111, 2014.

241 Zhao, J., Levitt, N. P., Zhang, R. Y., and Chen, J. M.: Heterogeneous reactions of methylglyoxal in acidic  
242 media: Implications for secondary organic aerosol formation, *Environmental Science & Technology*,  
243 40, 7682-7687, 10.1021/es060610k, 2006.

244

245
